# Supplementary material for: Poloxamer 407-Based Thermosensitive Emulgel as a Novel Formulation Providing a Controlled Release of Oil-Soluble Pharmaceuticals—Ibuprofen Case Study
Source: MDPI journal article supplement (doi:10.3390/ma14237266), 2021-11-27
Supplement: s1 [file s1]

# Poloxamer 407-Based Thermosensitive Emulgel as a Novel Formulation Providing a Controlled Release of Oil-Soluble Pharmaceuticals—Ibuprofen Case Study

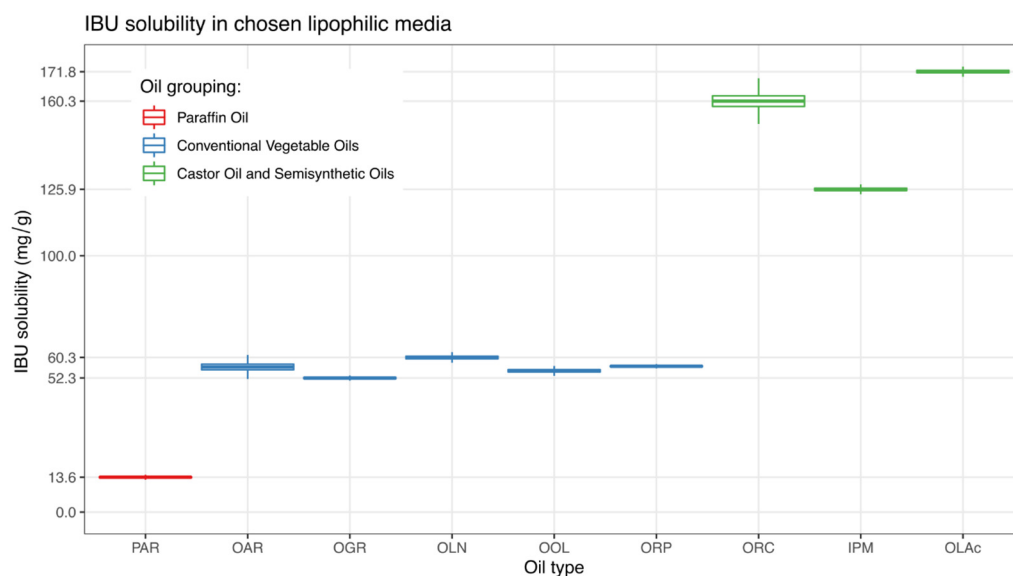

**Figure S1.** IBU solubility in tested media (mg/g). For abbreviations, see Table 1 in the paper. Means,  $\pm$ std. error,  $\pm$ 95% confidence interval;  $n = 3$ .

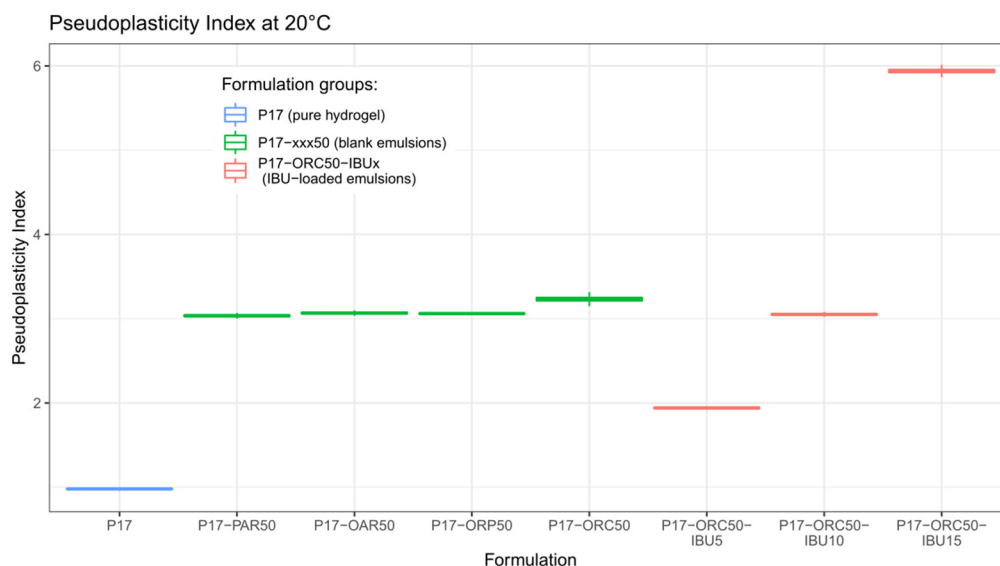

**Figure S2.** Pseudoplasticity indices at 20 °C. Means,  $\pm$ std. error,  $\pm$ 95% confidence interval;  $n = 3$ .

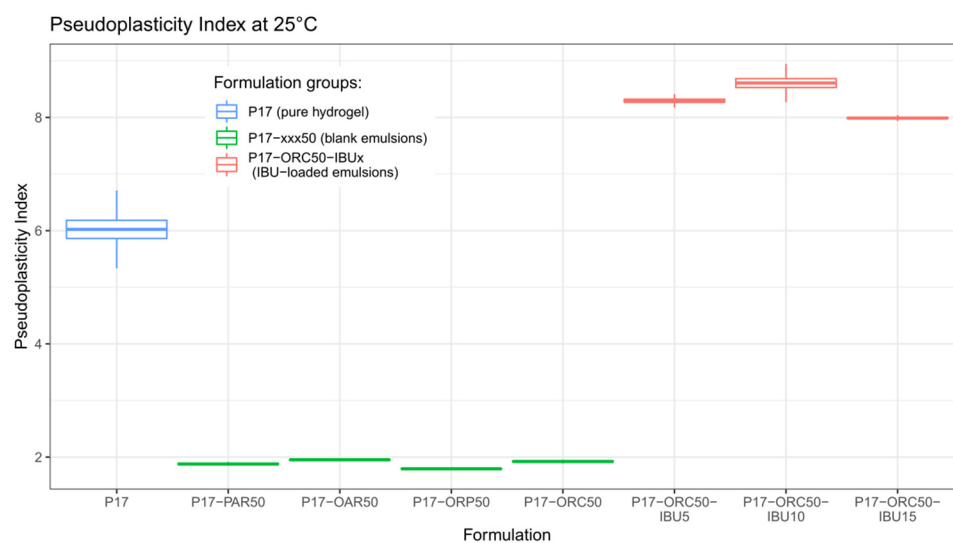

**Figure S3.** Pseudoplasticity indices at 25 °C. Means,  $\pm$ std. error,  $\pm$ 95% confidence interval;  $n = 3$ .

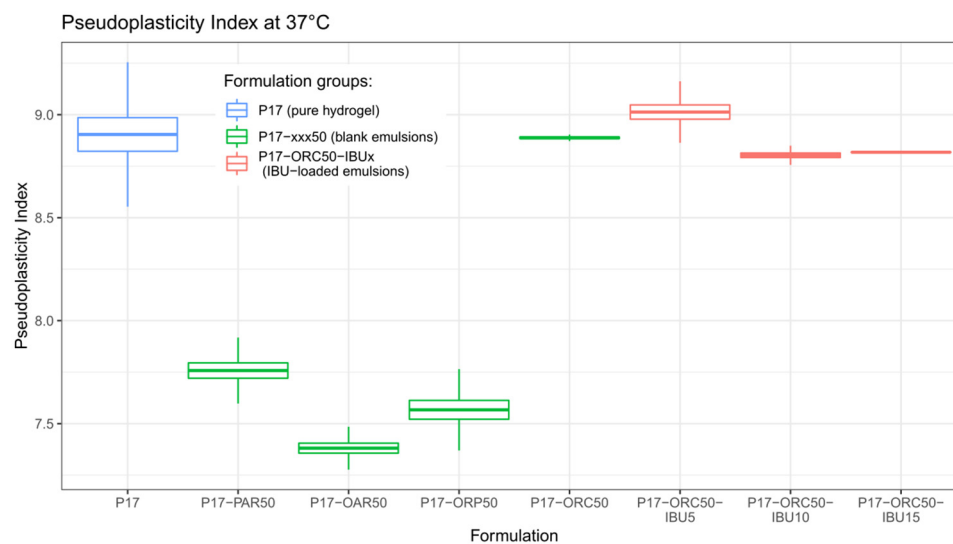

**Figure S4.** Pseudoplasticity indices at 37 °C. Means,  $\pm$ std. error,  $\pm$ 95% confidence interval;  $n = 3$ .

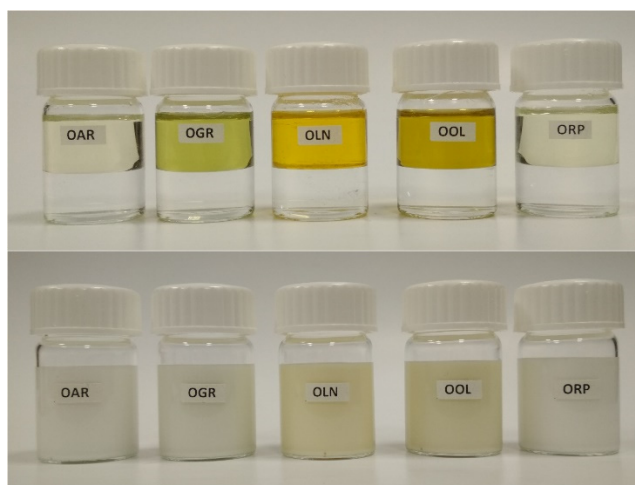

**Figure S5.** Mixtures of P17 and chosen natural oils, pre- and post-emulsification. Photographed in identical light conditions.

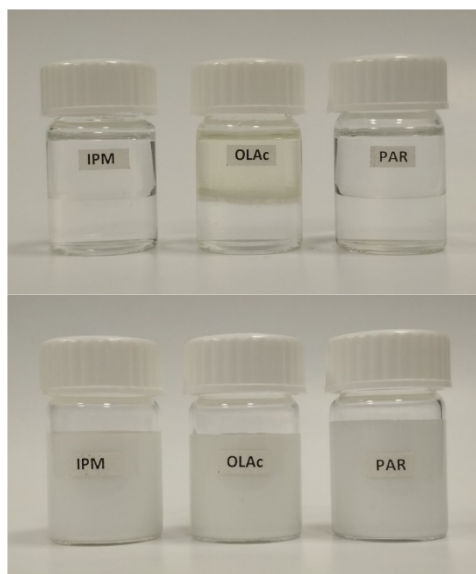

**Figure S6.** Mixtures of P17 and chosen semisynthetic oils, pre- and post-emulsification. Photographed in identical light conditions.

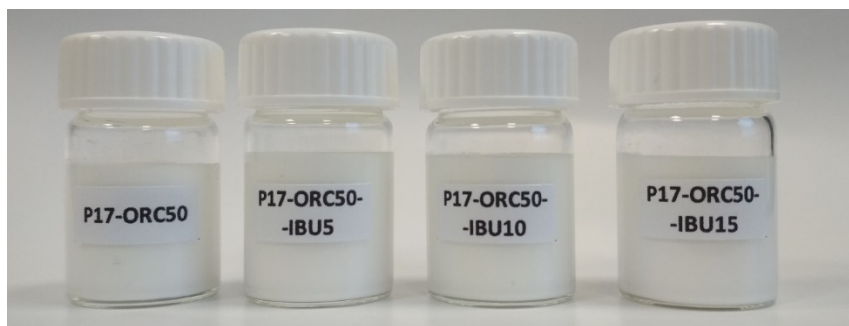

**Figure S7.** P17–ORC50 emulsion compared with IBU–loaded ORC emulsions.

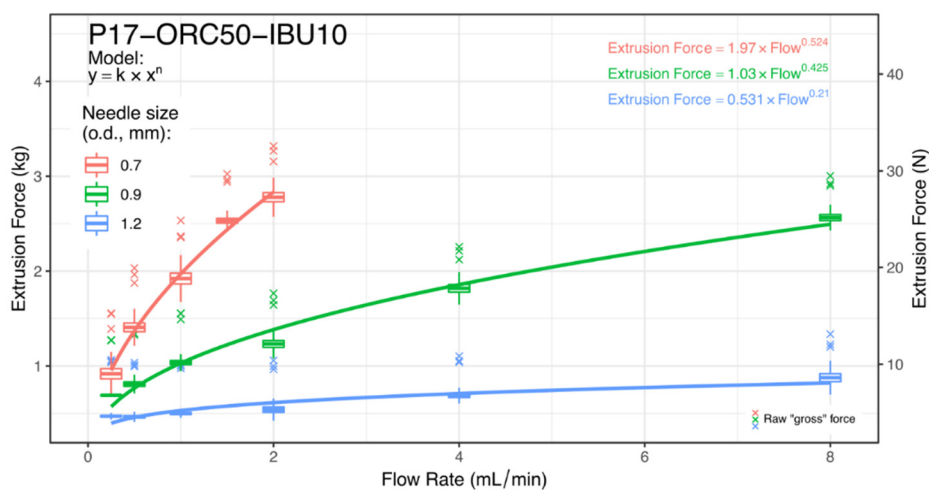

**Figure S8.** Syringeability study results in P17–ORC50–IBU10 emulsion. Models and box-and-whiskers plots were calculated upon net extrusion force, while raw (gross) data was also shown for a better consideration of the actual force needed to move the

plunger. Means,  $\pm$ std. error,  $\pm$ 95% confidence interval;  $n = 3$ .

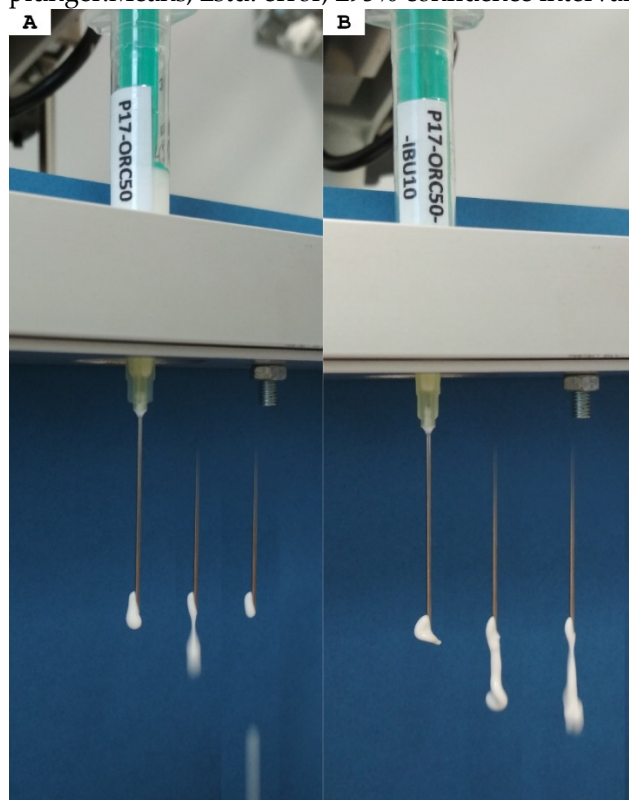

**Figure S9.** Extrusion process observed at the needle-end in syringeability study: (A) drop-wise flow in a blank emulsion; (B) formation and detachment of elongated drops in a gelated, IBU-loaded emulsion. Needle: 20 G (0.9 mm x 40 mm); flow rate: 0.5 mL/min; temperature: 25 °C.

**Table S1.** Specification of needles used in the syringeability study.

| Needle Gauge | Outer Diameter (mm) | Inner Diameter (mm) | Declared Length (mm) | Actual (measured) Capillary Length (mm) |
|--------------|---------------------|---------------------|----------------------|-----------------------------------------|
| 18 G         | 0.7                 | 0.413               | 30                   | 36.0                                    |
| 20 G         | 0.9                 | 0.603               | 40                   | 42.0                                    |
| 22 G         | 1.2                 | 0.838               | 40                   | 41.5                                    |

**Table S2.** Complete results of the drug release study. IBU released,  $\mu\text{g}/\text{mm}^2$ . Means  $\pm$ sd,  $n = 6$ .

| Time (h) | IBU Released ( $\mu\text{g}/\text{mm}^2$ ) |                 |                 |
|----------|--------------------------------------------|-----------------|-----------------|
|          | P17-ORC50-IBU5                             | P17-ORC50-IBU10 | P17-ORC50-IBU15 |
| 0.5      | $0.7 \pm 0.5$                              | $2.6 \pm 0.4$   | $2.5 \pm 1.1$   |
| 1        | $2.1 \pm 0.5$                              | $4.9 \pm 0.8$   | $5 \pm 1$       |
| 2        | $4.6 \pm 0.7$                              | $8.7 \pm 1.2$   | $10.9 \pm 0.9$  |
| 3        | $6.5 \pm 0.8$                              | $12.4 \pm 1.3$  | $16.1 \pm 1.9$  |
| 4        | $8.3 \pm 1$                                | $15.3 \pm 1.6$  | $20.7 \pm 1.3$  |
| 5        | $10.2 \pm 1.2$                             | $18.1 \pm 1.7$  | $24.6 \pm 1.3$  |
| 6        | $11.7 \pm 1.2$                             | $20.9 \pm 1.9$  | $29 \pm 3$      |
| 8        | $14.8 \pm 1.7$                             | $26 \pm 2$      | $36 \pm 4$      |
| 10       | $18 \pm 2$                                 | $31 \pm 2$      | $42 \pm 3$      |
| 12       | $22 \pm 3$                                 | $35 \pm 3$      | $50 \pm 5$      |
| 14       | $25 \pm 3$                                 | $39 \pm 3$      | $57 \pm 6$      |
| 16       | $28 \pm 4$                                 | $43 \pm 4$      | $60 \pm 5$      |

|    |        |        |         |
|----|--------|--------|---------|
| 18 | 32 ± 4 | 48 ± 4 | 70 ± 6  |
| 20 | 35 ± 4 | 52 ± 5 | 77 ± 6  |
| 22 | 38 ± 4 | 55 ± 5 | 84 ± 6  |
| 24 | 41 ± 4 | 59 ± 6 | 92 ± 6  |
| 28 | 46 ± 4 | 66 ± 8 | 102 ± 4 |
| 32 | 50 ± 4 | 72 ± 8 | 113 ± 3 |
| 36 | 53 ± 3 | 78 ± 7 | 126 ± 6 |
| 40 | 57 ± 4 | 83 ± 8 | 135 ± 6 |
| 44 | 60 ± 4 | 88 ± 8 | 146 ± 6 |
| 48 | 63 ± 4 | 92 ± 8 | 162 ± 9 |

**Table S3.** Complete results of segmented-fit modelling of the drug release kinetics; summary of adjusted-RSS values against proposed breakpoints. Values in bold are the minima found among the sums of Adjusted-RSS from non-linear and linear fits. K-P = Korsmeyer-Peppas model:  $y = k \times x^n$ ; Linear:  $y = k \times x$ .

| Break-point (h) | P17-ORC50-IBU5 |          |               | P17-ORC50-IBU0 |          |               | P17-ORC50-IBU15 |          |               |
|-----------------|----------------|----------|---------------|----------------|----------|---------------|-----------------|----------|---------------|
|                 | K-P            | Linear   | Sum           | K-P            | Linear   | Sum           | K-P             | Linear   | Sum           |
| 2               | 0.0657         | 9.52e-01 | 1.0176        | 0.000247       | 0.738791 | 0.7390        | 0.00112         | 0.296763 | 0.2979        |
| 3               | 0.2020         | 5.13e-01 | 0.7147        | 0.000165       | 0.325924 | 0.3261        | 0.00407         | 0.094336 | 0.0984        |
| 4               | 0.3439         | 3.41e-01 | 0.6846        | 0.002249       | 0.199445 | 0.2017        | 0.01308         | 0.044287 | <b>0.0574</b> |
| 5               | 0.4368         | 2.47e-01 | 0.6839        | 0.005930       | 0.126883 | 0.1328        | 0.03998         | 0.027685 | 0.0677        |
| 6               | 0.6033         | 1.92e-01 | 0.7958        | 0.008357       | 0.077987 | 0.0863        | 0.05690         | 0.016596 | 0.0735        |
| 8               | 0.8629         | 1.28e-01 | 0.9912        | 0.012246       | 0.040505 | 0.0528        | 0.11378         | 0.011955 | 0.1257        |
| 10              | 0.9297         | 8.21e-02 | 1.0118        | 0.022789       | 0.025806 | 0.0486        | 0.20935         | 0.010584 | 0.2199        |
| 12              | 0.7930         | 5.08e-02 | 0.8438        | 0.029364       | 0.016292 | 0.0457        | 0.22640         | 0.008160 | 0.2346        |
| 14              | 0.8189         | 3.64e-02 | 0.8553        | 0.037106       | 0.011039 | 0.0481        | 0.23549         | 0.007691 | 0.2432        |
| 16              | 0.7780         | 2.04e-02 | 0.7983        | 0.045095       | 0.007122 | 0.0522        | 0.34877         | 0.007550 | 0.3563        |
| 18              | 0.6399         | 8.54e-03 | 0.6484        | 0.040613       | 0.003724 | 0.0443        | 0.28489         | 0.001996 | 0.2869        |
| 20              | 0.5562         | 3.85e-03 | 0.5601        | 0.040655       | 0.002576 | <b>0.0432</b> | 0.22457         | 0.001239 | 0.2258        |
| 22              | 0.5325         | 1.66e-03 | 0.5342        | 0.042831       | 0.001746 | 0.0446        | 0.19055         | 0.001020 | 0.1916        |
| 24              | 0.5319         | 4.70e-04 | <b>0.5324</b> | 0.045188       | 0.001075 | 0.0463        | 0.14592         | 0.000849 | 0.1468        |
| 28              | 0.7109         | 1.08e-04 | 0.7110        | 0.053486       | 0.000431 | 0.0539        | 0.14780         | 0.000698 | 0.1485        |
| 32              | 1.0736         | 3.11e-05 | 1.0736        | 0.066624       | 0.000139 | 0.0668        | 0.17073         | 0.000641 | 0.1714        |
| 36              | 1.6247         | 2.46e-05 | 1.6248        | 0.093163       | 0.000080 | 0.0932        | 0.16813         | 0.000644 | 0.1688        |
| 40              | 2.2452         | 1.09e-06 | 2.2452        | 0.126833       | 0.000025 | 0.1269        | 0.19789         | 0.000213 | 0.1981        |
